# Supplementary material for: Facile synthesis of an acid-responsive cinnamaldehyde-pendant polycarbonate for enhancing the anticancer efficacy of etoposide via glutathione depletion
Source: Royal Society of Chemistry journal article supplement (doi:10.1039/d4ra02468k), 2024-01-01
Supplement: d4ra02468k1.pdf [file d4ra02468k1.pdf]

## Electronic Supplementary Information

# Facile Synthesis of an Acid-Responsive Cinnamaldehyde-Pendant Polycarbonate for Enhancing the Anticancer Efficacy of Etoposide via Glutathione Depletion

*Shaojie Wu, Kuofei Liao, Jiamin Chen and Feng Li\**

Key Laboratory of Biomedical Polymers of Ministry of Education, College of Chemistry and  
Molecular Science, Wuhan University, Wuhan, 430072, PR China

E-mail address: lifeng@whu.edu.cn (F. Li)

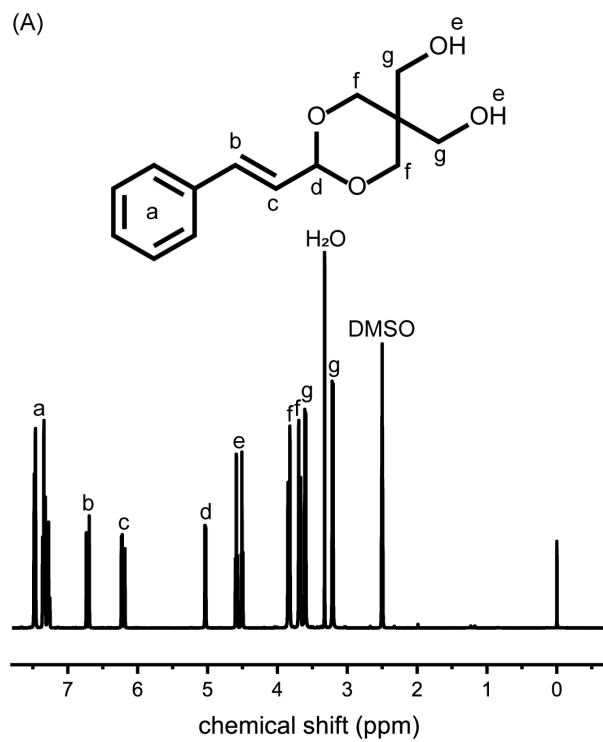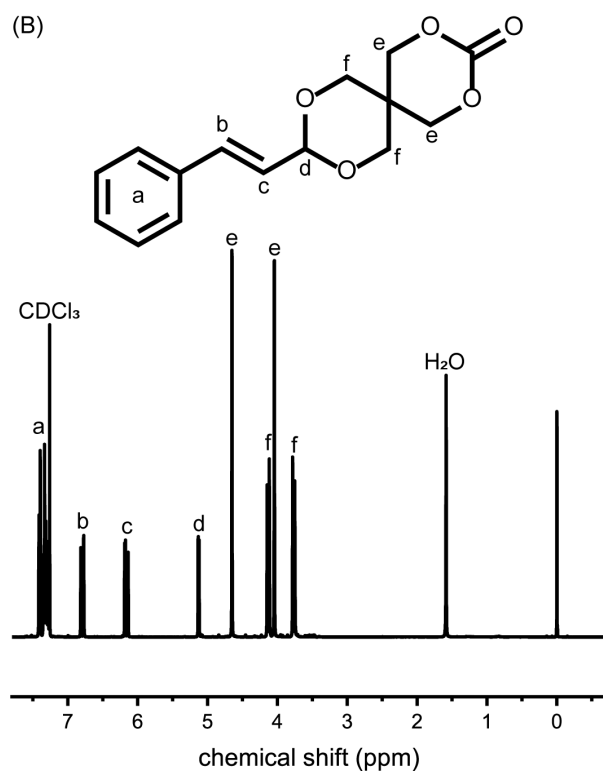

Figure S1. (A)  $^1\text{H}$  NMR spectrum of PERCA. (B)  $^1\text{H}$  NMR spectrum of STO.

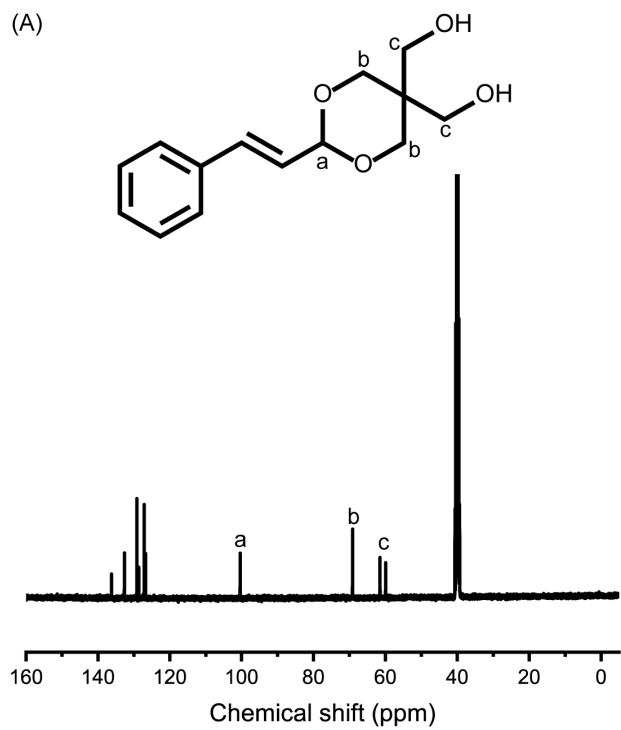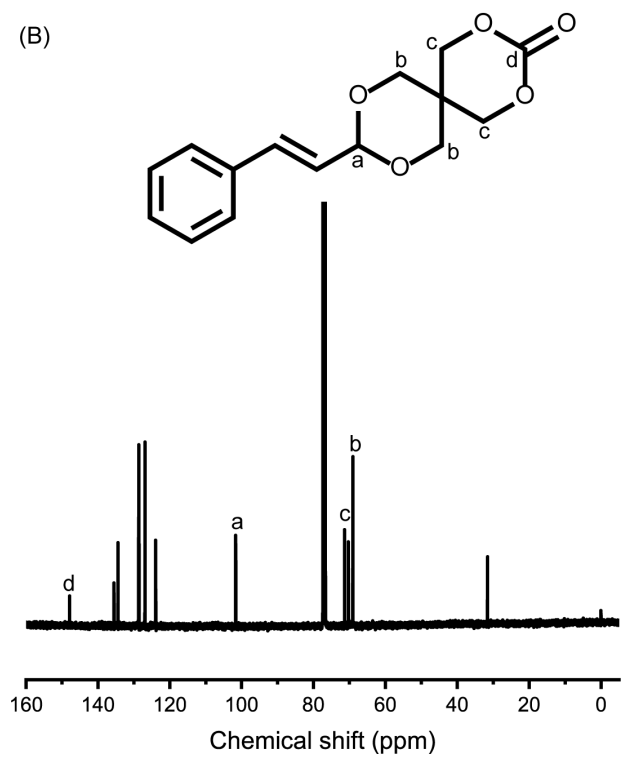

Figure S2. (A)  $^{13}\text{C}$  NMR spectrum of PERCA. (B)  $^{13}\text{C}$  NMR spectrum of STO.

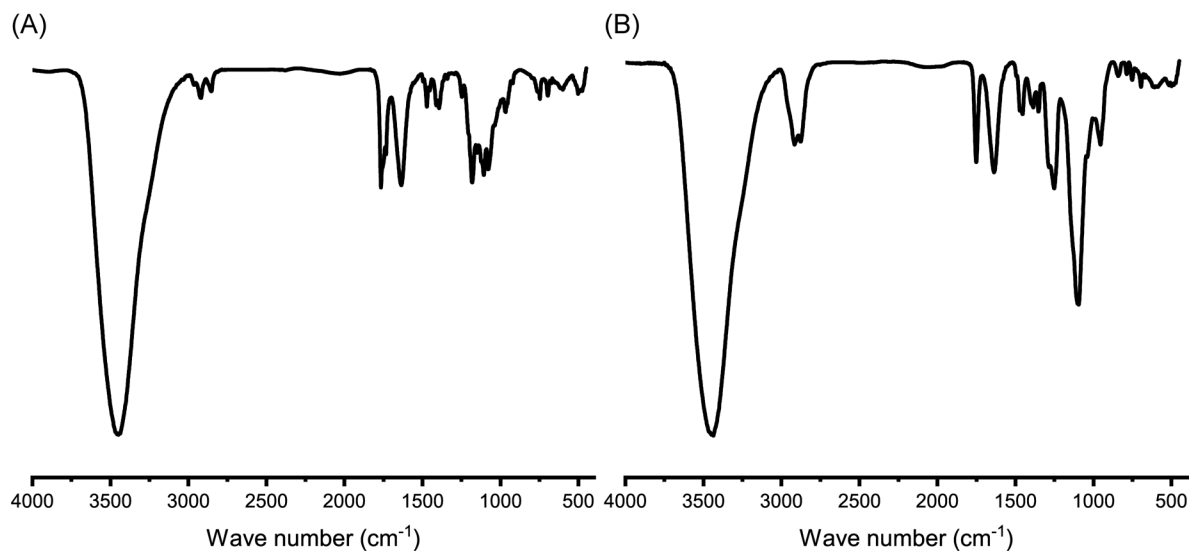

Figure S3. FTIR spectra of STO (A) and PEG-PCA (B).

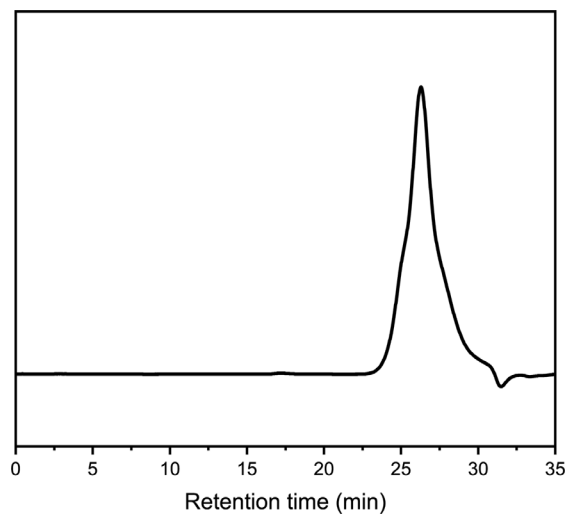

Figure S4. GPC curve of PEG-PCA.

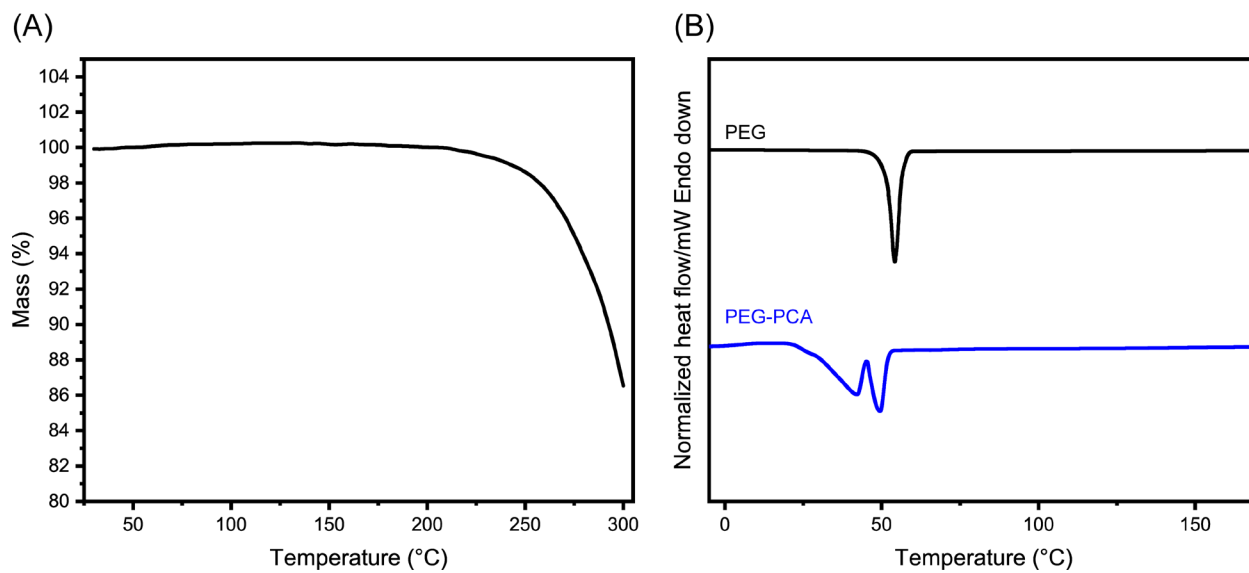

Figure S5. TGA curve (A) and DSC curve (B) of PEG-PCA.

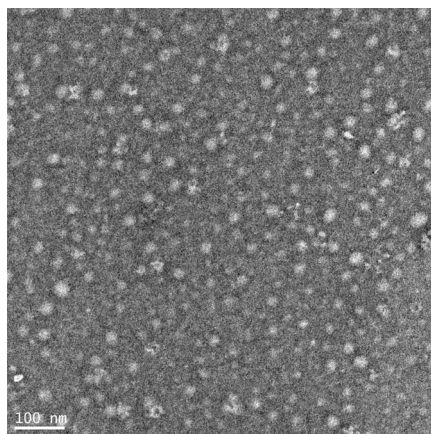

Figure S6. TEM image of PCA. Scale bar: 100 nm.

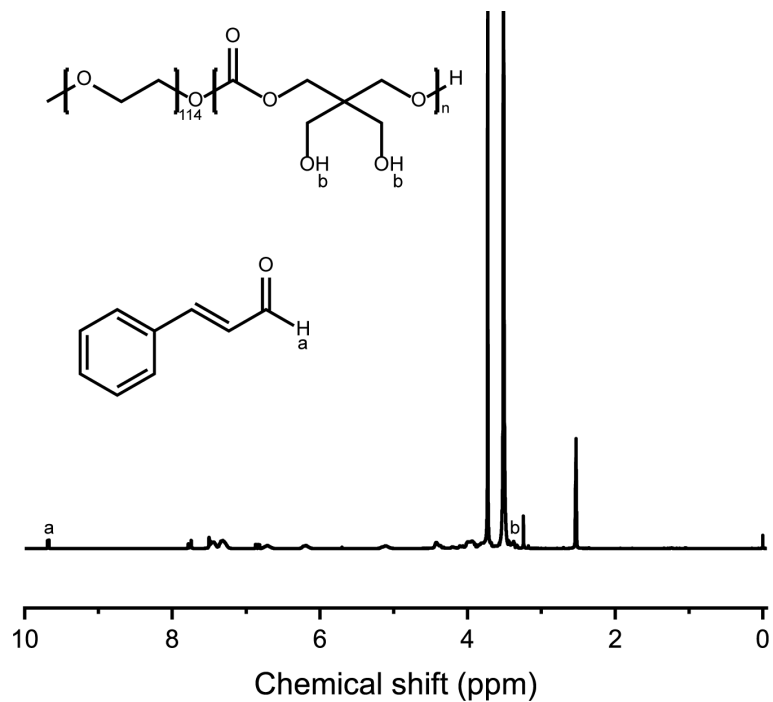

Figure S7.  $^1\text{H}$  NMR spectrum ( $\text{D}_2\text{O}$  (pD = 4.0)/ $\text{DMSO-d}_6$ , 400 MHz) of PEG-PCA after hydrolysis.

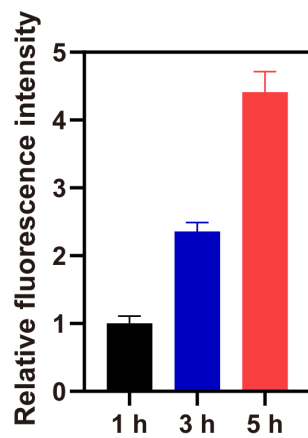

Figure S8. Quantitative analysis of C6 fluorescence intensity over time ( $n = 3$ ).

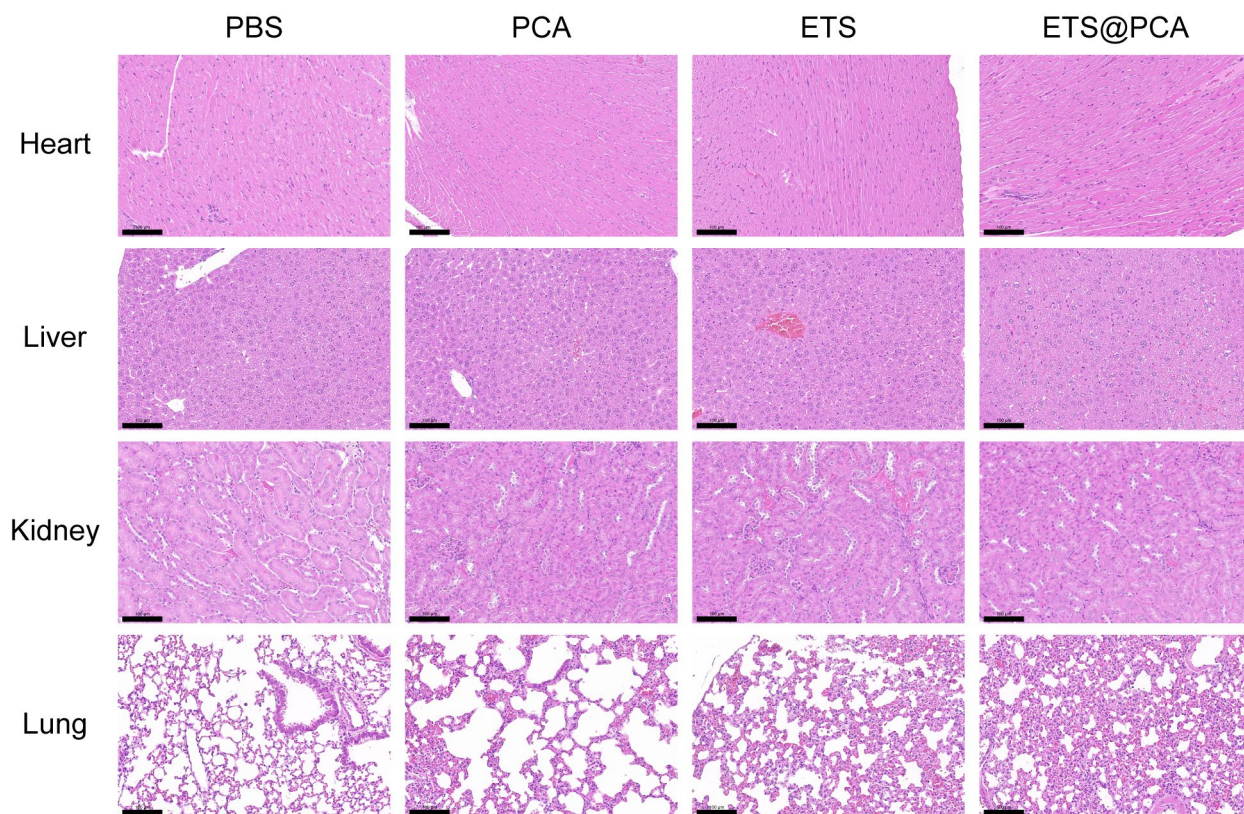

Figure S9. Histological analysis of major healthy organs (heart, kidney, liver, lung) by H&E staining (scale: 100  $\mu$ m).
